# Supplementary material for: Thermally activated delayed fluorescence with dual-emission and pressure-induced bidirectional shifting: cooperative effects of intramolecular and intermolecular energy transfer
Source: Royal Society of Chemistry journal article supplement (doi:10.1039/d2sc05792a), 2022-12-22
Supplement: d2sc05792a1.pdf [file d2sc05792a1.pdf]

## Electronic Supplementary Information (ESI)

### **Thermally Activated Delayed Fluorescence with Dual-Emission and Pressure-Induced Bidirectional Shifting: Cooperative Effects of Intramolecular and Intermolecular Energy Transfer**

Chenyue Zhao,<sup>a</sup> Zhipeng Ding,<sup>a</sup> Yibin Zhang,<sup>a</sup> Zhigang Ni,<sup>a</sup> Shijun Li,<sup>a</sup> Shaolong Gong,<sup>\*b</sup> Bo Zou,<sup>c</sup> Kai Wang<sup>\*c</sup> and Ling Yu<sup>\*a</sup>

<sup>a</sup> College of Material, Chemistry and Chemical Engineering, Key Laboratory of Organosilicon Chemistry and Material Technology, Ministry of Education, Hangzhou Normal University, Hangzhou, 311121, People's Republic of China.

<sup>b</sup> Hubei Key Lab on Organic and Polymeric Optoelectronic Materials, Department of Chemistry, Wuhan University, Wuhan, 430072, People's Republic of China

<sup>c</sup> State Key Laboratory of Superhard Materials, Jilin University, Qianjin Street 2699, Changchun 130012, People's Republic of China.

Corresponding Author

\*(L. Yu). E-mail: [lingyu@hznu.edu.cn](mailto:lingyu@hznu.edu.cn)

\*(S. Gong). E-mail: [slgong@whu.edu.cn](mailto:slgong@whu.edu.cn)

\*(K. Wang). E-mail: [kaiwang@jlu.edu.cn](mailto:kaiwang@jlu.edu.cn)

### ***General Information***

The  $^1\text{H}$  NMR and  $^{13}\text{C}$  NMR spectra were recorded on a Bruker Advance III (500 MHz) spectrometer with DMSO and  $\text{CDCl}_3$  as the solvent, respectively. The fluorescence titration experiments were conducted on a HITACHI F-7000 spectrofluorophotometer. Mass spectra were recorded on a Micromass Quattro II triplequadrupole mass spectrometer using electrospray ionization and analyzed with the MassLynx software suite or an Agilent Technologies 6530 Q-TOF mass spectrometer with an ESI resource. UV-Vis absorption spectra were recorded on a TU-1810 UV-Vis spectrophotometer. Photoluminescence (PL) spectra were recorded on a Hitachi F-4700 fluorescence spectrophotometer. For the steady state PL spectra of DMAC-W-SOF and PXZ-W-SOF in toluene and powder state, their excitation wavelengths were 308 nm and 325 nm, respectively. Cyclic voltammetry (CV) was carried out in nitrogen-purged dichloromethane (oxidation scan) at room temperature with a CHI voltammetric analyzer.  $\text{N-Bu}_4\text{PF}_6$  (0.1 M) was used as the supporting electrolyte. The conventional three-electrode configuration consists of a platinum working electrode, a platinum wire auxiliary electrode, and an Ag wire pseudoreference electrode with ferrocenium-ferrocene ( $\text{Fc}^+/\text{Fc}$ ) as the internal standard. The PL lifetimes were measured by a single photon counting spectrometer from Edinburgh Instruments (FLS980) with EPLED and VPLED pulsed UV-LASTER (LASTER277 and LASTER375), and 60 W flashing xenon lamp as the excitation source. Among them, LASTER277 laser was used as the excitation light source for the transient spectra test of DMAC-W-SOF in toluene and powder state; For PXZ-W-SOF, LASTER375 laser was used as the excitation light source in toluene solution, and 60 W flashing xenon lamp mode was used for the powder state and the temperature-dependent transient PL decays measurement, and the excitation wavelength was 325

nm. The photoluminescence quantum efficiency was measured using an absolute photoluminescence quantum yield measurement system (Edinburgh Instruments FLS980).

## Synthesis of materials

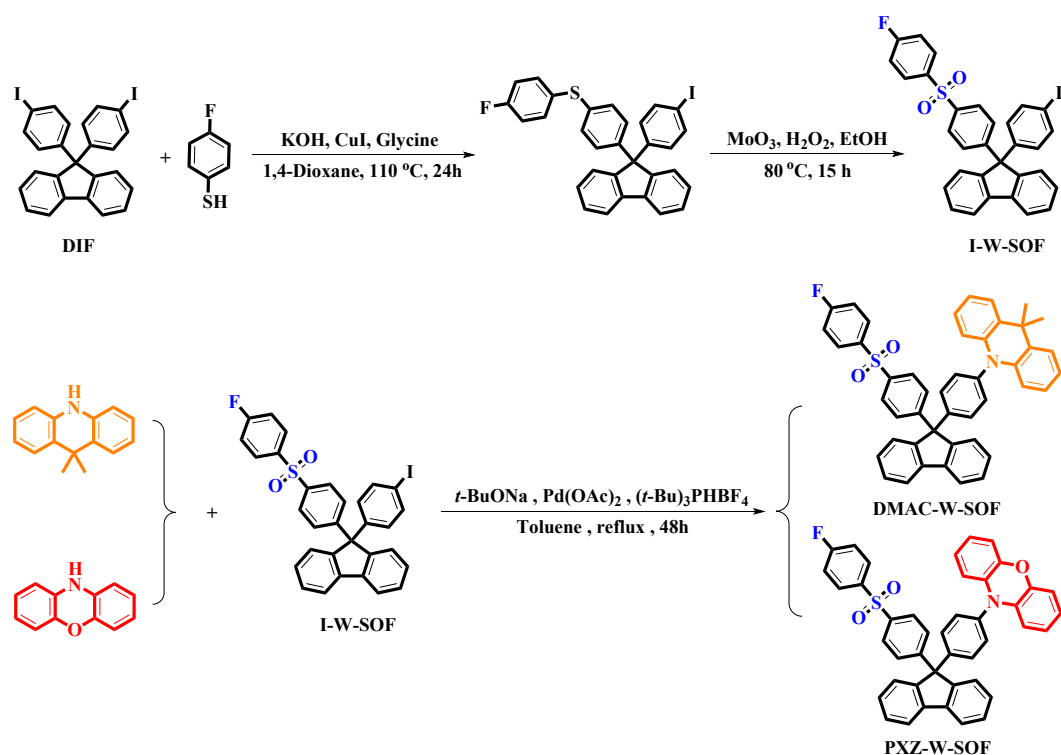

**Scheme S1.** Synthetic procedures of **DMAC-W-SOF** and **PXZ-W-SOF**.

9-(4-((4-fluorophenyl)sulfonyl)phenyl)-9-(4-iodophenyl)-9*H*-fluorene (**I-W-SOF**): A mixture of 9,9-bis(4-iodophenyl)fluorene (2.00 g, 3.51 mmol), 4-fluorothiophenol (0.50 g, 3.91 mmol), CuI (0.03 g, 0.16 mmol), Glycine (0.05 g, 0.67 mmol), KOH (0.39 g, 6.96 mmol) and 1,4-dioxane (60 mL) was refluxed under argon for 24 hours. After cooled, the mixture was extracted with brine and CH<sub>2</sub>Cl<sub>2</sub>, and dried over anhydrous Na<sub>2</sub>SO<sub>4</sub>. After concentrated under reduced pressure distillation, a yellow liquid was obtained, then MoO<sub>3</sub> (0.10 g, 0.69 mmol) and 30% H<sub>2</sub>O<sub>2</sub> (30 mL) were added, and the mixture was refluxed in EtOH (50 mL) for 15 hours. After it was cooled to room

temperature, the mixture was extracted with brine and  $\text{CH}_2\text{Cl}_2$ , and dried over anhydrous  $\text{Na}_2\text{SO}_4$  again. After removal of the solvent, the residue was purified by column chromatography on silica gel using petroleum ether/dichloromethane (1:2 by vol.) as the eluent to give a white powder (0.97 g, yield: 46%).  $^1\text{H}$  NMR (500 MHz,  $\text{CDCl}_3$ )  $\delta$  [ppm]: 8.03-8.00 (m, 2H), 7.96 (d,  $J = 5.0$  Hz, 2H), 7.87 (d,  $J = 10.0$  Hz, 2H), 7.62 (d,  $J = 10.0$  Hz, 2H), 7.46-7.42 (m, 6H), 7.35-7.30 (m, 4H), 6.89 (d,  $J = 10.0$  Hz, 2H).  $^{13}\text{C}$  NMR (125 MHz,  $\text{CDCl}_3$ )  $\delta$  [ppm]: 165.45, 163.41, 150.52, 148.35, 143.52, 139.08, 138.92, 136.56, 136.49, 136.46, 129.57, 129.49, 128.94, 127.92, 127.20, 127.09, 126.59, 124.83, 119.54, 115.66, 115.48, 91.78, 63.98. MS (ESI)  $m/z$  for  $\text{C}_{31}\text{H}_{20}\text{FIO}_2\text{S}$  ( $\text{M}+\text{Na}$ ) $^+$  625.0105, found 625.0115.

10-(4-(9-(4-((4-fluorophenyl)sulfonyl)phenyl)-9H-fluoren-9-yl)phenyl)-9,9-dimethyl-9,10-dihydroacridine (**DMAC-W-SOF**): A mixture of I-W-SOF (1.50 g, 2.49 mmol), 9,9-dimethyl-9,10-dihydroacridine (0.63 g, 3.01 mmol),  $\text{Pd}(\text{OAc})_2$  (20 mg, 0.09 mmol),  $(t\text{-Bu})_3\text{PHBF}_4$  (87 mg, 0.30 mmol),  $t\text{-BuONa}$  (0.58 g, 6.04 mmol), and toluene (60 mL) was refluxed under argon for 48 h. After cooled, the mixture was extracted with brine and  $\text{CH}_2\text{Cl}_2$ , and dried over anhydrous  $\text{Na}_2\text{SO}_4$ . After removal of the solvent, the residue was purified by column chromatography on silica gel using dichloromethane/petroleum ether (2:1 by vol.) as the eluent to give a white powder (1.52 g, yield: 89%).  $^1\text{H}$  NMR (500 MHz,  $\text{CDCl}_3$ )  $\delta$  [ppm]: 8.03-8.00 (m, 2H), 7.88 (t,  $J = 5.0$  Hz, 4H), 7.51-7.45 (m, 10H), 7.40 (t,  $J = 5.0$  Hz, 2H), 7.27 (t,  $J = 10.0$  Hz, 2H), 7.21 (t,  $J = 5.0$  Hz, 2H), 7.03-6.96 (m, 4H), 6.30 (d,  $J = 10.0$  Hz, 2H), 1.72 (s, 6H).  $^{13}\text{C}$  NMR (125 MHz,  $\text{CDCl}_3$ )  $\delta$  [ppm]: 166.54, 164.50, 152.11, 149.78, 144.77, 140.84, 140.29, 140.18, 140.01, 137.61, 131.34, 130.69, 130.61, 130.52, 130.13, 129.07, 128.32, 128.24, 127.75, 126.37, 126.20, 125.24, 120.69, 116.77,

116.59, 114.03, 65.28, 36.00, 31.15. MS (ESI)  $m/z$  for  $C_{46}H_{34}FNO_2S$  ( $M+H$ )<sup>+</sup> 683.2289, found 683.2259.

10-(4-(9-(4-((4-fluorophenyl)sulfonyl)phenyl)-9H-fluoren-9-yl)phenyl)-10*H*-phenoxazine (**PXZ-W-SOF**): It was prepared by the same procedure with **DMAC-W-SOF** excepting using 10*H*-phenoxazin (0.60 g, 3.28 mmol) to replace 9,9-dimethyl-9,10-dihydroacridine. **PXZ-W-SOF** is a green powder (1.38 g, yield: 84%). <sup>1</sup>H NMR (500 MHz, (CD<sub>3</sub>)<sub>2</sub>SO)  $\delta$  [ppm]: 8.04-8.02 (m, 2H), 7.99 (d,  $J$  = 5.0 Hz, 2H), 7.91 (d,  $J$  = 5.0 Hz, 2H), 7.53 (d,  $J$  = 5.0 Hz, 2H), 7.46-7.34 (m, 10H), 7.29 (d,  $J$  = 10.0 Hz, 2H), 6.71-6.69 (m, 2H), 6.65-6.59 (m, 4H), 5.82-5.81 (m, 2H). <sup>13</sup>C NMR (125 MHz, (CD<sub>3</sub>)<sub>2</sub>SO)  $\delta$  [ppm]: 166.40, 164.38, 152.14, 149.68, 145.50, 143.57, 140.12, 140.01, 137.78, 137.76, 137.50, 134.18, 131.20, 131.13, 131.00, 130.93, 129.36, 128.81, 128.20, 126.57, 124.14, 121.97, 121.35, 117.64, 117.46, 115.75, 113.58, 65.19. MS (ESI)  $m/z$  for  $C_{43}H_{28}FNO_3S$  ( $M+H$ )<sup>+</sup> 657.1768, found 657.1771.

## X-ray structural analysis:

**Table S1.** Crystal data and structure refinement for **DMAC-W-SOF** and **PXZ-W-SOF**

|                                             |                                                                |                                                                |
|---------------------------------------------|----------------------------------------------------------------|----------------------------------------------------------------|
| Identification code                         | CCDC: 2164967 (DMAC-W-SOF)                                     | CCDC: 2164968 (PXZ-W-SOF)                                      |
| Empirical formula                           | C <sub>46</sub> H <sub>34</sub> FNO <sub>2</sub> S             | C <sub>43</sub> H <sub>28</sub> FNO <sub>3</sub> S             |
| Formula weight                              | 683.80                                                         | 657.72                                                         |
| Temperature/K                               | 170.0                                                          | 170.0                                                          |
| Crystal system                              | monoclinic                                                     | monoclinic                                                     |
| Space group                                 | P2 <sub>1</sub> /n                                             | P2 <sub>1</sub> /c                                             |
| a/Å                                         | 8.1805(3)                                                      | 11.6223(4)                                                     |
| b/Å                                         | 16.2254(5)                                                     | 22.3952(8)                                                     |
| c/Å                                         | 25.9415(10)                                                    | 13.1540(4)                                                     |
| $\alpha$ /°                                 | 90                                                             | 90                                                             |
| $\beta$ /°                                  | 90.036(2)                                                      | 101.8440(10)                                                   |
| $\gamma$ /°                                 | 90                                                             | 90                                                             |
| Volume/Å <sup>3</sup>                       | 3443.3(2)                                                      | 3350.9(2)                                                      |
| Z                                           | 4                                                              | 4                                                              |
| $\rho_{\text{calc}}$ /cm <sup>3</sup>       | 1.319                                                          | 1.304                                                          |
| $\mu$ /mm <sup>-1</sup>                     | 0.142                                                          | 0.145                                                          |
| F(000)                                      | 1432.0                                                         | 1368.0                                                         |
| Crystal size/mm <sup>3</sup>                | 0.49 × 0.38 × 0.17                                             | 0.42 × 0.236 × 0.19                                            |
| Radiation                                   | MoK $\alpha$ ( $\lambda$ = 0.71073)                            | MoK $\alpha$ ( $\lambda$ = 0.71073)                            |
| 2 $\Theta$ range for data collection/°      | 5.022 to 50.7                                                  | 4.016 to 54.222                                                |
| Reflections collected                       | 41959                                                          | 51990                                                          |
| Independent reflections                     | 6296 [ $R_{\text{int}}$ = 0.0408, $R_{\text{sigma}}$ = 0.0234] | 7398 [ $R_{\text{int}}$ = 0.0516, $R_{\text{sigma}}$ = 0.0289] |
| Data/restraints/parameters                  | 6296/2/462                                                     | 7398/0/442                                                     |
| Goodness-of-fit on F <sup>2</sup>           | 1.026                                                          | 1.017                                                          |
| Final R indexes [ $I \geq 2\sigma(I)$ ]     | $R_1$ = 0.0388, $wR_2$ = 0.0968                                | $R_1$ = 0.0464, $wR_2$ = 0.1226                                |
| Final R indexes [all data]                  | $R_1$ = 0.0483, $wR_2$ = 0.1033                                | $R_1$ = 0.0646, $wR_2$ = 0.1356                                |
| Largest diff. peak/hole / e Å <sup>-3</sup> | 0.40/-0.41                                                     | 0.75/-0.38                                                     |

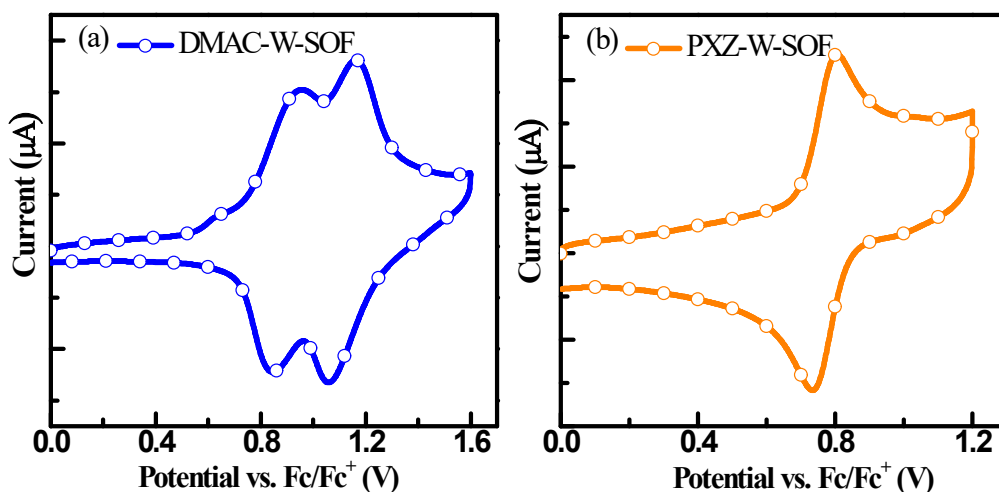

**Fig. S1.** Cyclic voltammogram of target compounds (a) DMAC-W-SOF and (b) PXZ-W-SOF in  $\text{CH}_2\text{Cl}_2$  for oxidation scan.

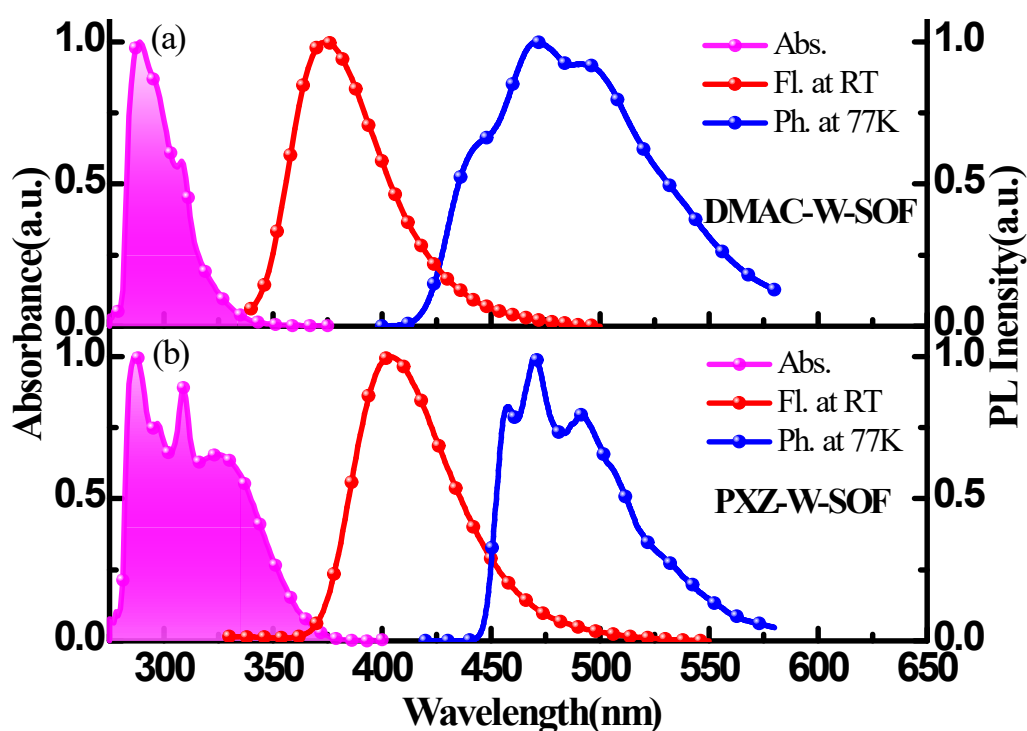

**Fig. S2.** Normalized UV-Vis absorption of (a) DMAC-W-SOF, and (b) PXZ-W-SOF in toluene. Fluorescence and Phosphorescence spectra of these two compounds were measured in toluene ( $10^{-4}$  M) and 2-methyl-tetrahydrofuran, respectively. The pink and the red lines represent UV-Vis and fluorescence spectra, respectively, while the blue lines represent phosphorescence spectra.

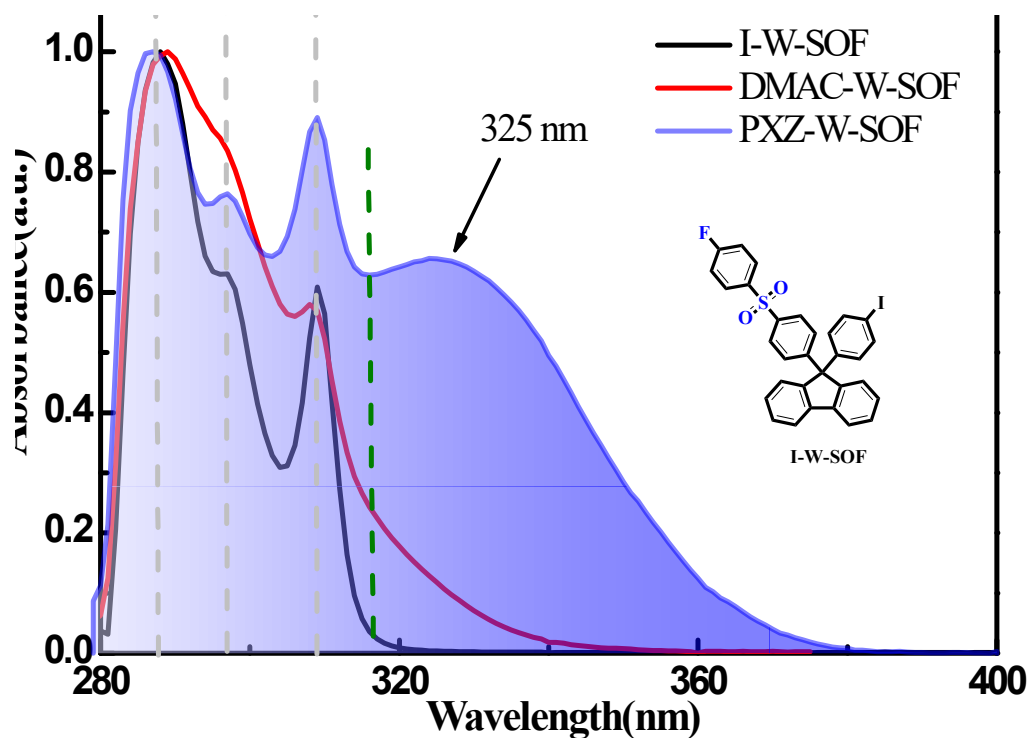

**Fig. S3.** Normalized UV-Vis absorption of I-W-SOF, DMAC-W-SOF and PXZ-W-SOF in toluene ( $10^{-4}$  M) (Insert: molecular structure of I-W-SOF).

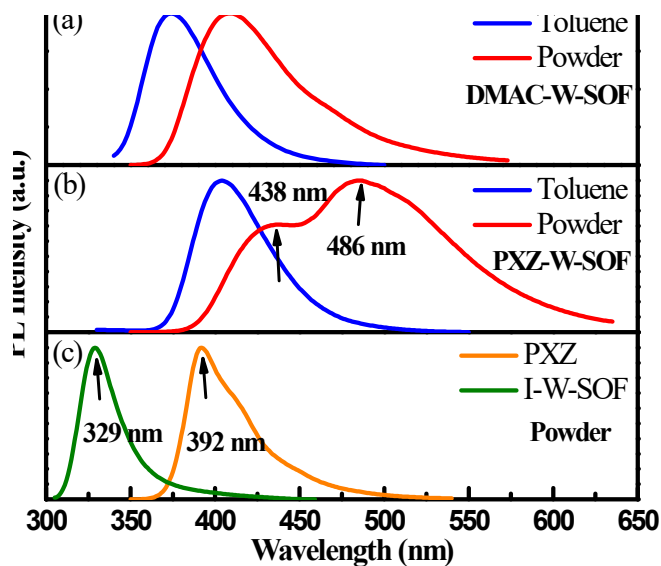

**Fig. S4.** Normalized fluorescence spectra of (a) DMAC-W-SOF, (b) PXZ-W-SOF and (c) PXZ and I-W-SOF.



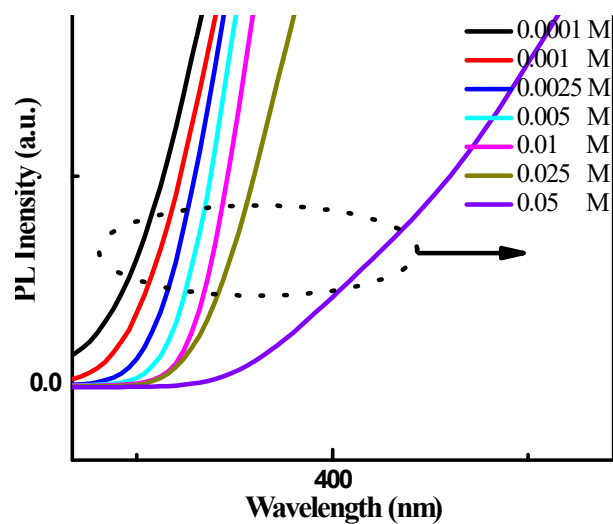

**Fig. S5.** Zoom-in schematic of the normalized fluorescence spectra of PXZ-W-SOF at different concentrations (0.0001-0.05 M) in toluene solution.

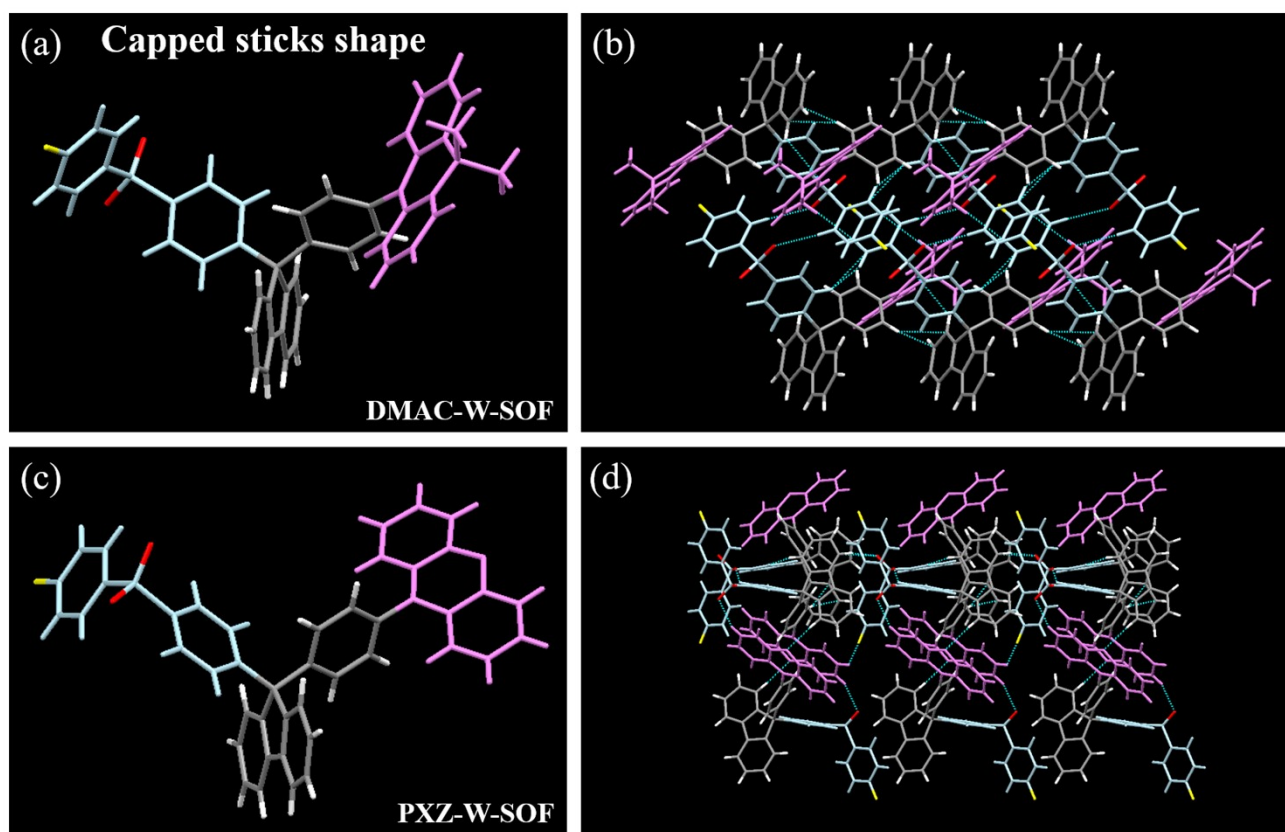

**Fig. S6.** Single crystal structure of DMAC-W-SOF and PXZ-W-SOF: (a) molecular structure and (b) packing structure of DMAC-W-SOF; (c) molecular structure and (d) packing structure of PXZ-W-SOF.

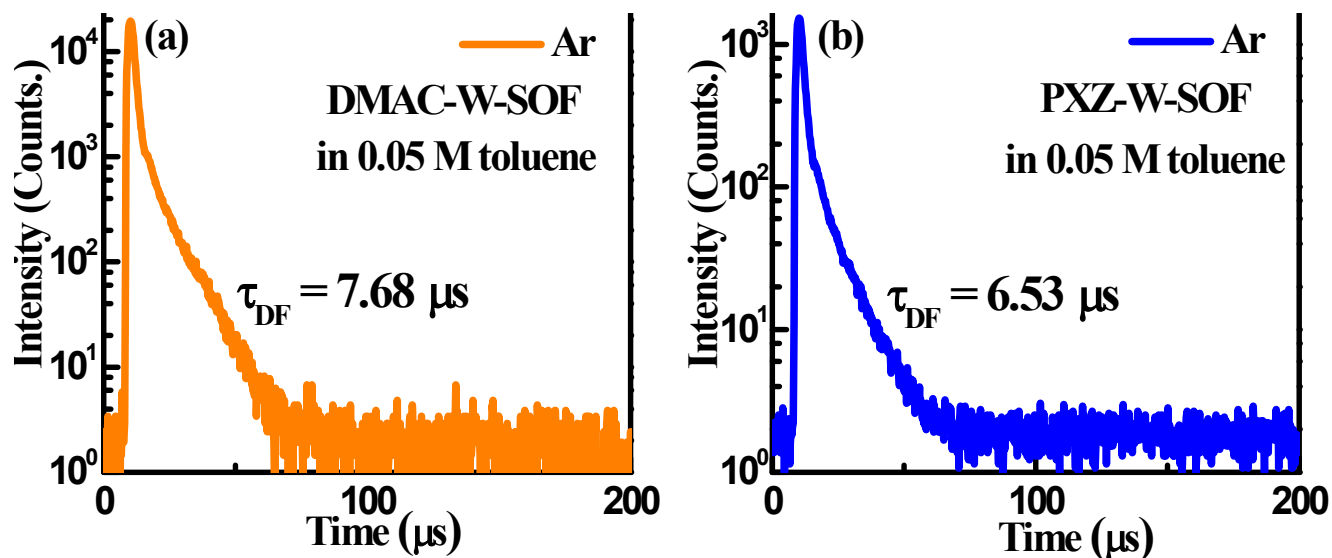

**Fig. S7.** Transient PL characteristics of (a) DMAC-W-SOF and (b) PXZ-W-SOF in toluene (0.05 M) under argon conditions at room temperature.

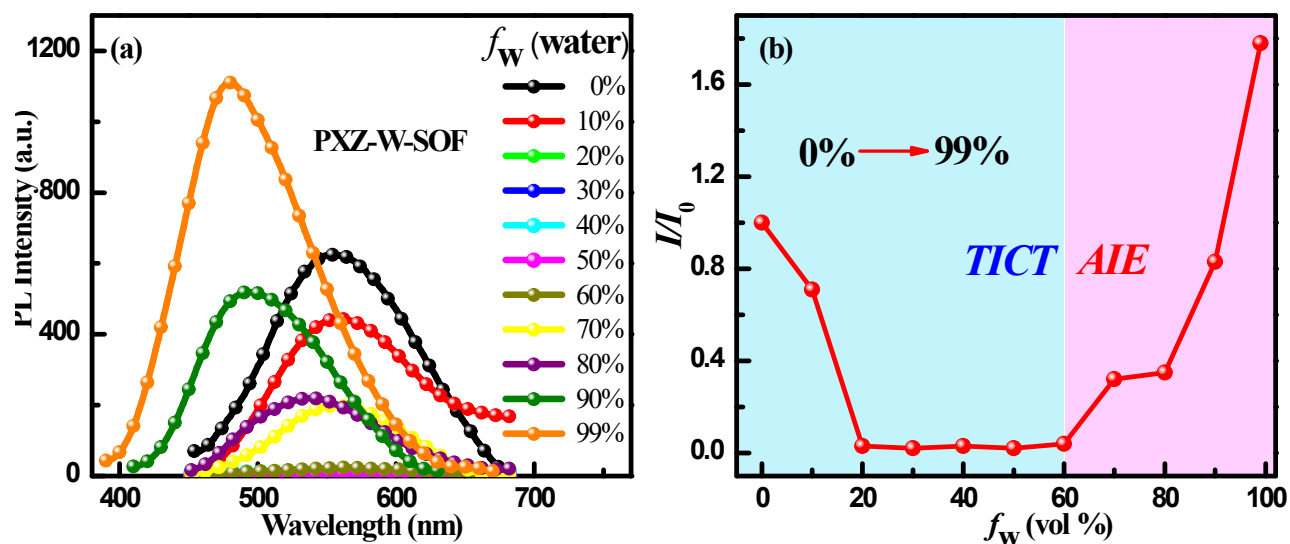

**Fig. S8.** (a) PL spectra of PXZ-W-SOF in THF/water mixtures ( $10^{-4}$  M) with different water fractions ( $f_w = 0$  to 99%) at room temperature, and (b) plots of PL peaks vs  $f_w$  of PXZ-W-SOF.
